# Supplementary material for: Polyploid Giant Cancer Cells Generated from Human Cytomegalovirus-Infected Prostate Epithelial Cells
Source: MDPI journal article supplement (doi:10.3390/cancers15204994), 2023-10-15
Supplement: s1 [file s1]

# Polyploid giant cancer cells generated from human cytomegalovirus-infected prostate epithelial cells

Supplementary Data

Supplementary Figures

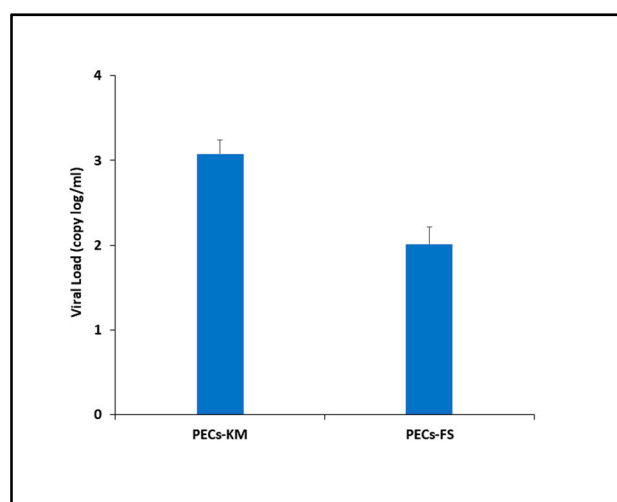

**Supplementary Figure S1. Replication of low-risk HCMV strains in PECs cultures.** Histogram representing the viral titer in the supernatant of PECs infected with HCMV-KM and FS as measured by IE1-qPCR.

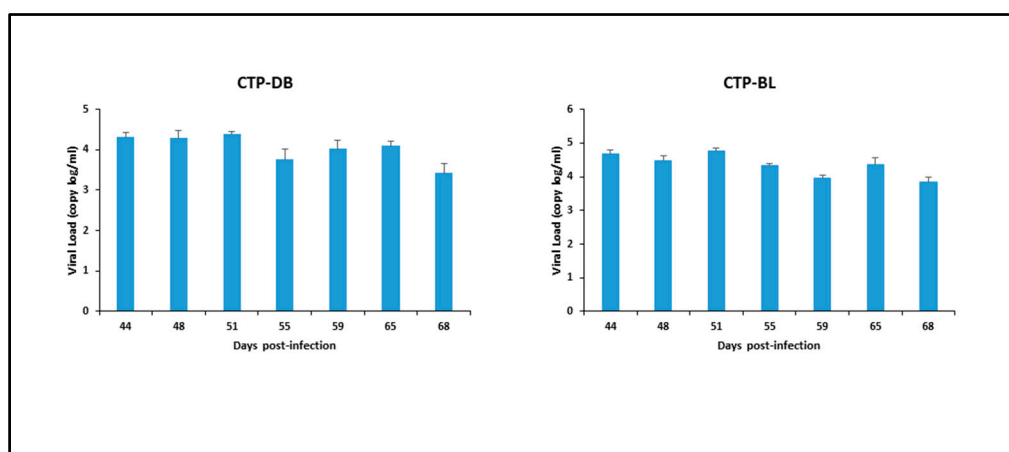

**Supplementary Figure S2. Sustained HCMV replication in CTP-DB and BL cultures.** Histograms representing the viral titer in the supernatant of CTP cells infected with HCMV-DB and BL as measured by IE1-qPCR. Data are represented as mean  $\pm$  SD of two independent experiments.

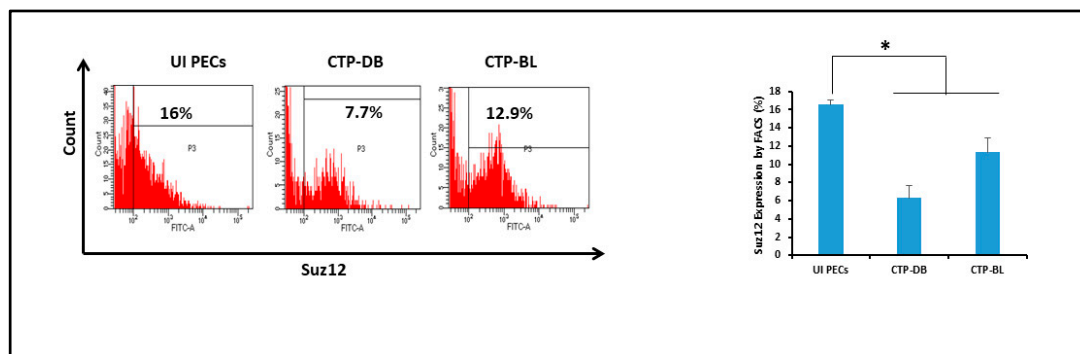

**Supplementary Figure S3. Expression of Suz12 in CTP-DB and BL cultures.** FACS staining of Suz12 in uninfected PECs as well as CTP-DB and BL cells. Data are represented as mean  $\pm$  SD of two independent experiments. \* p-value  $\leq 0.05$ .

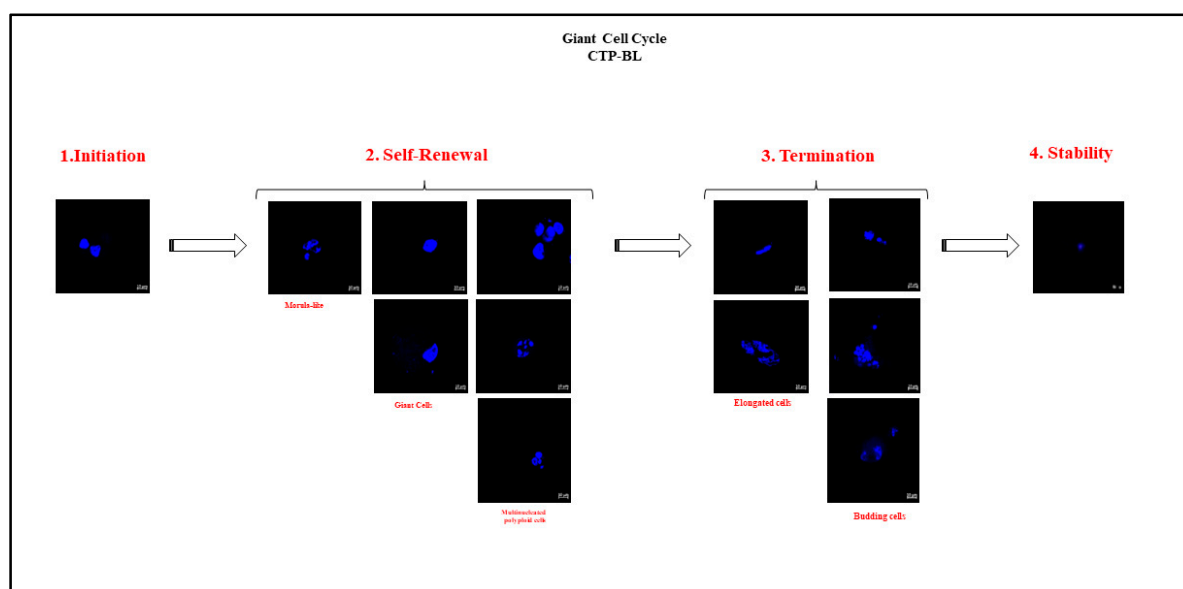

**Supplementary Figure S4. A schematic diagram representing the giant cell cycling in CTP-BL cell cultures.** Confocal microscopic images of DAPI staining in CTP-BL; magnification  $\times 63$ , scale bar 10  $\mu\text{m}$ .

## Supplementary Tables

Supplementary Table S1. List of antibodies.

| Antibody                             | Catalog Number/Source                           |
|--------------------------------------|-------------------------------------------------|
| Anti-Myc Tag                         | 06-549-25UG/Merck KGaA, (Darmstadt, Germany)    |
| EZH2                                 | AB_2793397/Active Motif (Carlsbad, CA, USA)     |
| Ki67Ag                               | BD-556026/BD Biosciences (Franklin Lakes, USA)  |
| IE1                                  | ab53495/Abcam (Cambridge, UK)                   |
| SOX2                                 | ab97959/Abcam (Cambridge, UK)                   |
| Vimentin                             | SC-6260/Santa Cruz Biotechnology (CA, USA)      |
| E-cadherin                           | SC-8426/Santa Cruz Biotechnology (CA, USA)      |
| Nestin                               | SC-23927/Santa Cruz Biotechnology (CA, USA)     |
| Phalloidine                          | ab235137/ Abcam (Cambridge, UK)                 |
| Nanog                                | SC-293121/Santa Cruz Biotechnology (CA, USA)    |
| Suz12                                | AB_2614929/Active Motif (Carlsbad, CA, USA)     |
| FITC-conjugated anti-mouse antibody  | BD- 553399/BD Biosciences (Franklin Lakes, USA) |
| FITC-conjugated anti-rabbit antibody | ab6717/Abcam (Cambridge, UK)                    |
| FITC-conjugated Goat Anti-Mouse      | BD-555988/BD Biosciences (Franklin Lakes, USA)  |
| FITC-conjugated Rat Anti-Mouse       | BD-553443/BD Biosciences (Franklin Lakes, USA)  |
| Propidium Iodide                     | P3566/Life Technologies (Eugene, USA)           |
